# Supplementary material
Source: MDPI journal article supplement (https://www.mdpi.com/2504-5377/8/1/12)
Supplement: s1 [file s1]

Archive with 7 entries (7 files):
- Figure S10. 3D visualization of cavity micelle intermediate.GIF
- Figure S11. 3D visualization of vesicle.GIF
- Figure S6. The vesiculation process.GIF
- Figure S7. 3D visualization of wormlike micelle intermediate.GIF
- Figure S8. 3D visualization of rectangular lamella intermediate.GIF
- Figure S9. 3D visualization of disk lamella intermediate.GIF
- Supplementary Tables and Figures.pdf
