# Supplementary material
Source: MDPI journal article supplement (https://www.mdpi.com/2504-5377/8/1/12)

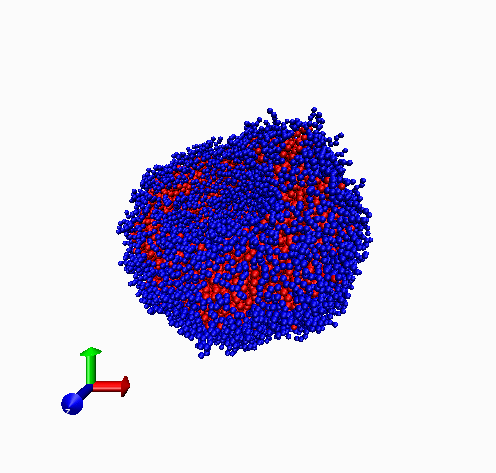

Supplement: s1 [file s1 › Figure S10. 3D visualization of cavity micelle intermediate.GIF]

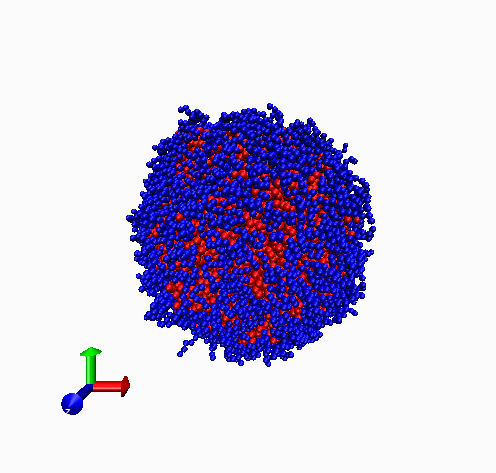

Supplement: s1 [file s1 › Figure S11. 3D visualization of vesicle.GIF]

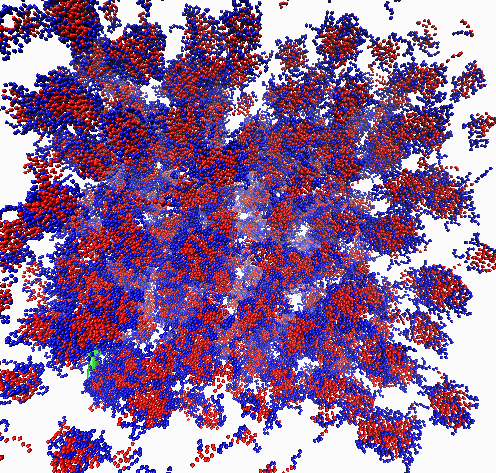

Supplement: s1 [file s1 › Figure S6. The vesiculation process.GIF]

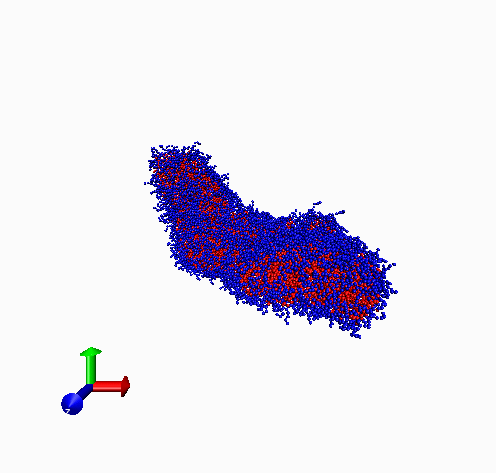

Supplement: s1 [file s1 › Figure S7. 3D visualization of wormlike micelle intermediate.GIF]

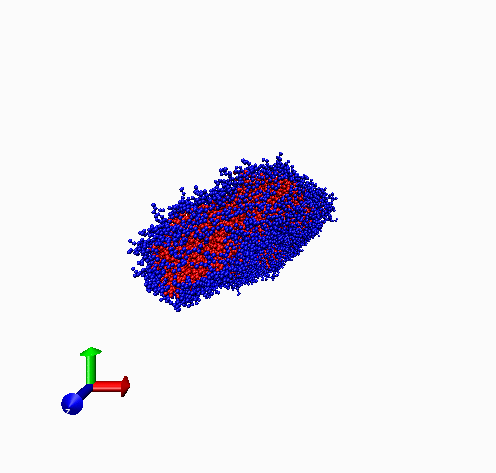

Supplement: s1 [file s1 › Figure S8. 3D visualization of rectangular lamella intermediate.GIF]

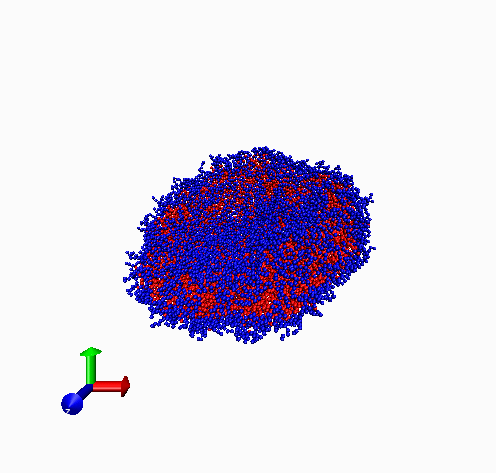

Supplement: s1 [file s1 › Figure S9. 3D visualization of disk lamella intermediate.GIF]
